# Supplementary material for: Comparing between virtual reality based pre-clinical implantation training and traditional learning methods
Source: PeerJ journal article supplement (doi:10.7717/peerj.18891), 2025-02-24
Supplement: Supplemental_Data_S2.xlsx [file Supplemental_Data_S2.xlsx]

## Sheet: Sheet1
group	subject	preferred learning approach ( score: 1 paper-10 electronics )	video game interest (score: 1-10)	degree of interest in Oral Implantology (score: 1-10)	learning confidence (score: 1-10)
VR based PCIT	1	1	7	6	8
VR based PCIT	2	3	6	7	6
VR based PCIT	3	4	5	5	5
VR based PCIT	4	3	7	8	8
VR based PCIT	5	3	4	7	8
VR based PCIT	6	4	5	7	9
VR based PCIT	7	2	7	9	10
VR based PCIT	8	1	9	10	10
VR based PCIT	9	3	6	8	8
VR based PCIT	10	5	8	9	9
Traditional PCIT	11	5	9	6	7
Traditional PCIT	12	2	7	5	4
Traditional PCIT	13	3	6	7	8
Traditional PCIT	14	2	9	9	10
Traditional PCIT	15	5	7	10	10
Traditional PCIT	16	1	8	8	8
Traditional PCIT	17	2	9	7	8
Traditional PCIT	18	4	4	9	10
Traditional PCIT	19	2	5	10	10
Traditional PCIT	20	4	7	8	7
