# Supplementary material for: Comparing between virtual reality based pre-clinical implantation training and traditional learning methods
Source: PeerJ journal article supplement (doi:10.7717/peerj.18891), 2025-02-24
Supplement: Supplemental_Data_S3.xlsx [file Supplemental_Data_S3.xlsx]

## Sheet: Sheet1
group	subject	t1 (10 score)	t2 (10 score)	t3 (10 score)
VR based PCIT	1	4	8	8
VR based PCIT	2	8	9	9
VR based PCIT	3	4	11	11
VR based PCIT	4	6	10	10
VR based PCIT	5	0	8	4
VR based PCIT	6	4	9	6
VR based PCIT	7	0	9	5
VR based PCIT	8	5	9	3
VR based PCIT	9	3	8	5
VR based PCIT	10	5	9	7
Traditional PCIT	11	3	7	6
Traditional PCIT	12	5	5	3
Traditional PCIT	13	4	4	5
Traditional PCIT	14	7	10	7
Traditional PCIT	15	3	5	5
Traditional PCIT	16	5	7	7
Traditional PCIT	17	4	4	4
Traditional PCIT	18	0	3	3
Traditional PCIT	19	5	7	7
Traditional PCIT	20	7	10	8
