# Supplementary material for: Comparing between virtual reality based pre-clinical implantation training and traditional learning methods
Source: PeerJ journal article supplement (doi:10.7717/peerj.18891), 2025-02-24
Supplement: Supplemental_Data_S4.xlsx [file Supplemental_Data_S4.xlsx]

## Sheet: Sheet1
group	subject	convenience (score: 1-10)	precision (score: 1-10)	interest (score: 1-10)	confidence (score: 1-10)	comfortableness (score: 1-10)	willingness (score: 1-10)
1	VR based PCIT	6	10	10	8	7	9
1	VR based PCIT	5	8	8	8	5	6
1	VR based PCIT	9	9	9	9	9	9
1	VR based PCIT	8	9	10	9	5	10
1	VR based PCIT	7	9	9	9	8	10
1	VR based PCIT	7	8	7	9	6	8
1	VR based PCIT	10	10	10	10	10	10
1	VR based PCIT	4	7	6	5	2	5
1	VR based PCIT	8	8	9	9	9	9
1	VR based PCIT	7	9	9	9	8	9
2	Traditional PCIT	6	9	7	6	4	5
2	Traditional PCIT	7	8	7	6	6	5
2	Traditional PCIT	6	9	6	7	5	5
2	Traditional PCIT	7	7	5	6	6	5
2	Traditional PCIT	5	8	6	7	4	5
2	Traditional PCIT	5	10	7	8	4	3
2	Traditional PCIT	6	9	8	7	5	6
2	Traditional PCIT	4	8	7	8	6	8
2	Traditional PCIT	6	9	7	7	4	6
2	Traditional PCIT	7	10	8	6	7	5
